# Supplementary material for: Luteodorsum huanglongense (Gomphaceae, Gomphales), a New Genus and Species of Gomphoid Fungus from the Loess Plateau, Northwest China
Source: J Fungi (Basel). 2023 Jun 13;9(6):664. doi: 10.3390/jof9060664 (PMC10304689; doi:10.3390/jof9060664)
Supplement: Supplementary file 1 [file jof-09-00664-s001.zip › jof-2374157-supplementary.pdf]

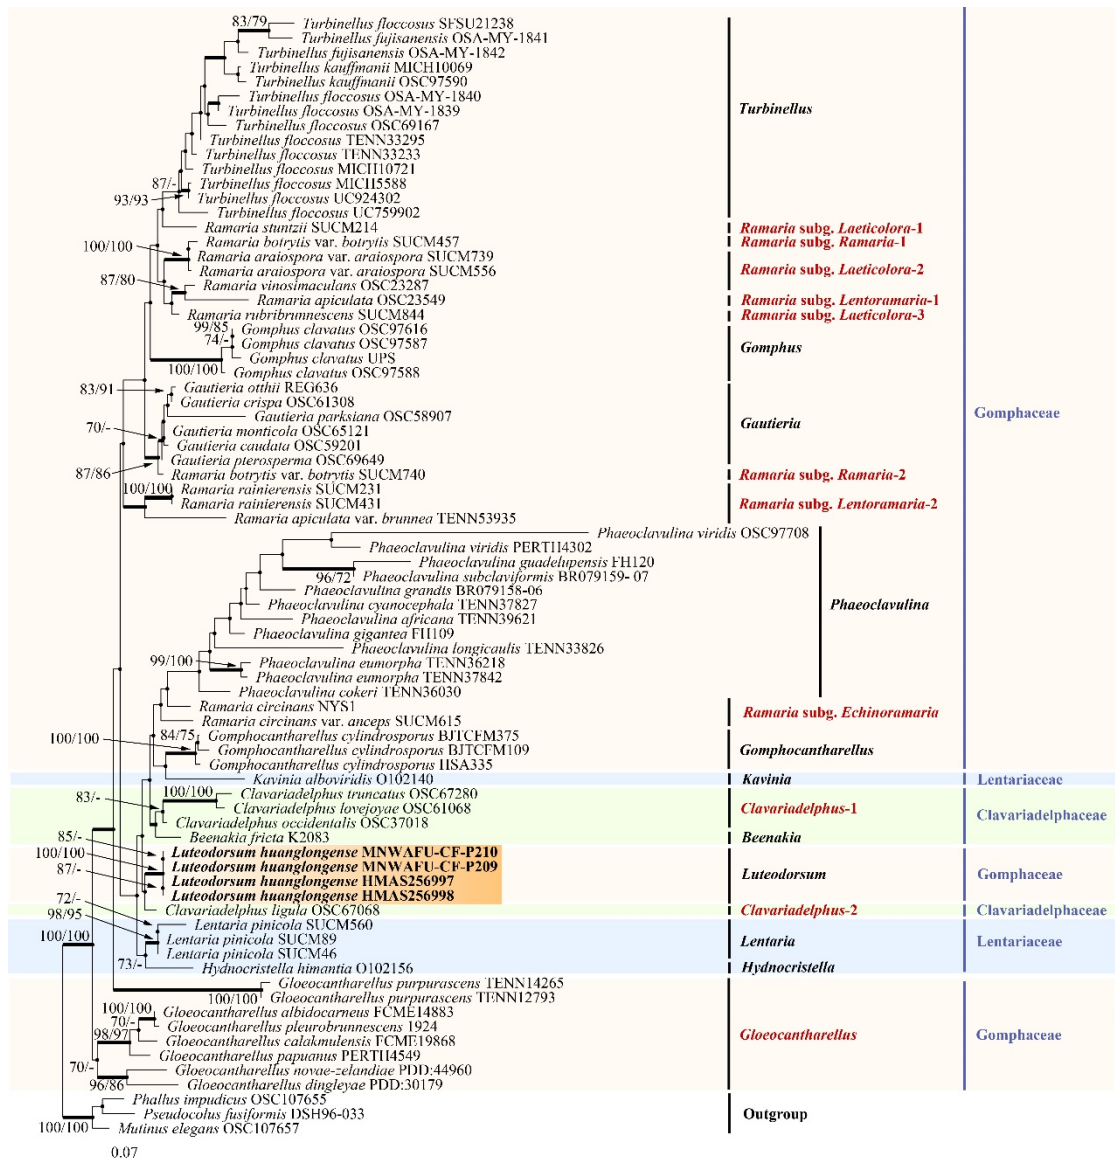

**Supplementary Figure S2.** Phylogenetic tree generated from a maximum likelihood analysis based on mtSSU sequences, depicting the phylogenetic relationships of Gomphales. *Phallus impudicus*, *Mutinus elegans*, and *Pseudocolus fusiformis* were used as outgroups. The nodes above the branches indicate the maximum likelihood bootstrap support (MLBS) values ( $\geq 70\%$ ) and maximum parsimony bootstrap support (MPBS) values ( $\geq 70\%$ ). The branches that presented a Bayesian posterior probability (BPP)  $\geq 0.95$  are thicker. The novel sequences are highlighted in bold and orange shade.

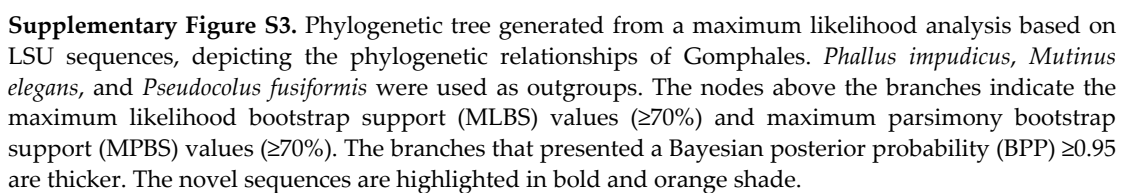

**Supplementary Figure S3.** Phylogenetic tree generated from a maximum likelihood analysis based on LSU sequences, depicting the phylogenetic relationships of Gomphales. *Phallus impudicus*, *Mutinus elegans*, and *Pseudocolus fusiformis* were used as outgroups. The nodes above the branches indicate the maximum likelihood bootstrap support (MLBS) values ( $\geq 70\%$ ) and maximum parsimony bootstrap support (MPBS) values ( $\geq 70\%$ ). The branches that presented a Bayesian posterior probability (BPP)  $\geq 0.95$  are thicker. The novel sequences are highlighted in bold and orange shade.

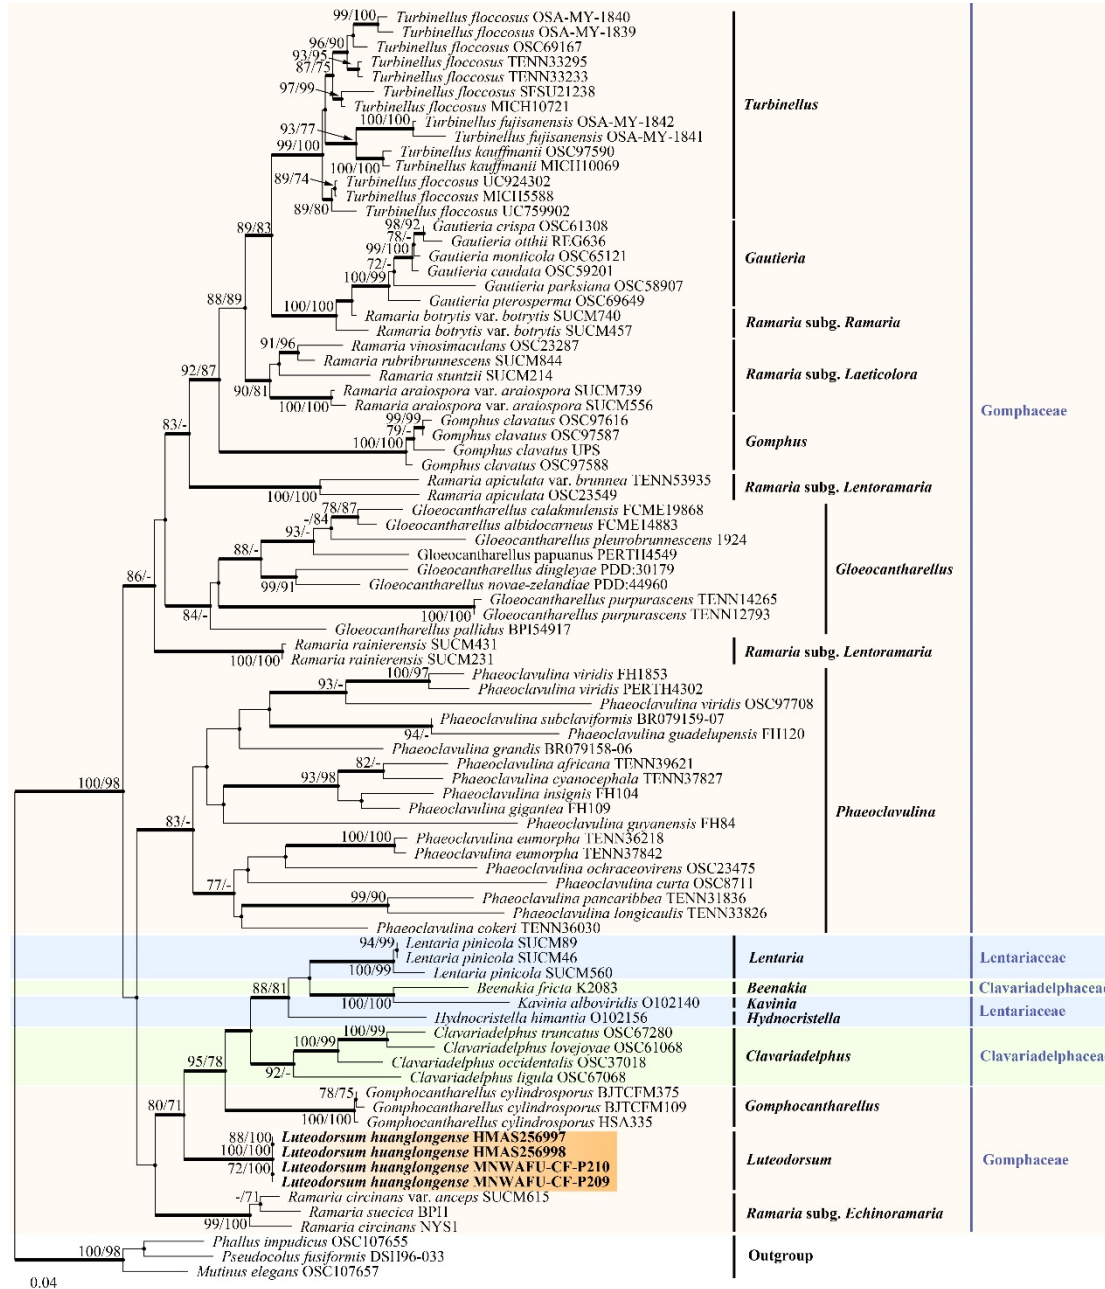

**Supplementary Figure S4.** Phylogenetic tree generated from a maximum likelihood analysis based on combined *atp6* and *mtSSU* sequences, depicting the phylogenetic relationships of Gomphales. *Phallus impudicus*, *Mutinus elegans*, and *Pseudocolus fusiformis* were used as outgroups. The nodes above the branches indicate the maximum likelihood bootstrap support (MLBS) values ( $\geq 70\%$ ) and maximum parsimony bootstrap support (MPBS) values ( $\geq 70\%$ ). The branches that presented a Bayesian posterior probability (BPP)  $\geq 0.95$  are thicker. The novel sequences are highlighted in bold and orange shade.
